# Supplementary material for: A PQS-Cleaving Quorum Quenching Enzyme Targets Extracellular Membrane Vesicles of Pseudomonas aeruginosa
Source: MDPI journal article supplement (doi:10.3390/biom12111656), 2022-11-08
Supplement: s1 [file s1]

## Supplementary material to:

### A PQS-Cleaving Quorum Quenching Enzyme Targets Extracellular Membrane Vesicles of *Pseudomonas aeruginosa*

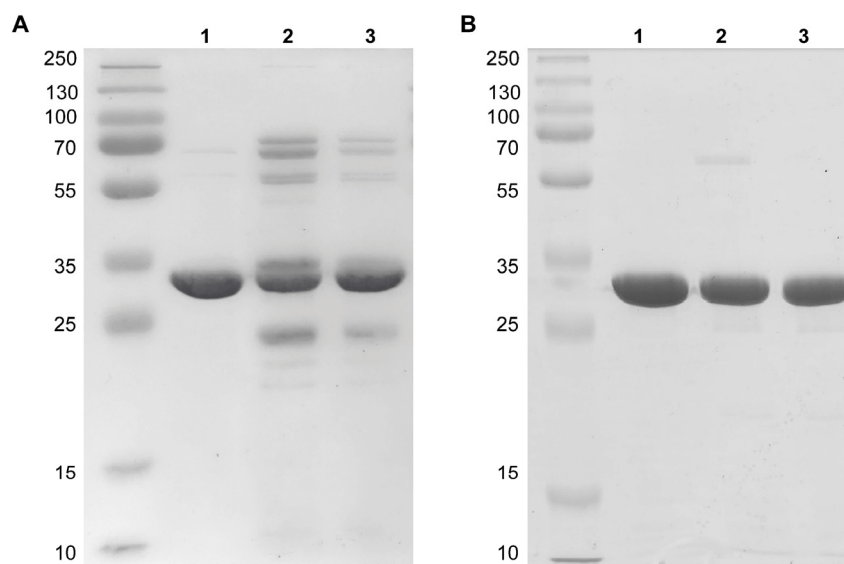

**Figure S1.** Apparent interaction of the PQS dioxygenases with extracellular proteins of *Pseudomonas aeruginosa* PA14, indicated by co-elution of **(A)** HQD<sub>S.b.</sub> and **(B)** AqdC with proteins from *P. aeruginosa* PA14 culture supernatant. 12.5% SDS-PAGE (Coomassie-stained). Lanes 1: HQD<sub>S.b.</sub> (A) and AqdC (B) purified by Ni<sup>2+</sup>-NTA affinity chromatography; lanes 2: HQD<sub>S.b.</sub> (A) and AqdC (B) were incubated for 1 hour with PA14 supernatant and subsequently subjected to Ni<sup>2+</sup>-NTA affinity chromatography; lanes 3: HQD<sub>S.b.</sub> (A) and AqdC (B) were loaded to the Ni<sup>2+</sup>-NTA column and washed with PA14 supernatant prior to elution. PageRuler™ Plus Prestained Protein Ladder (Thermo Scientific) was used as marker with molecular masses provided in kDa.

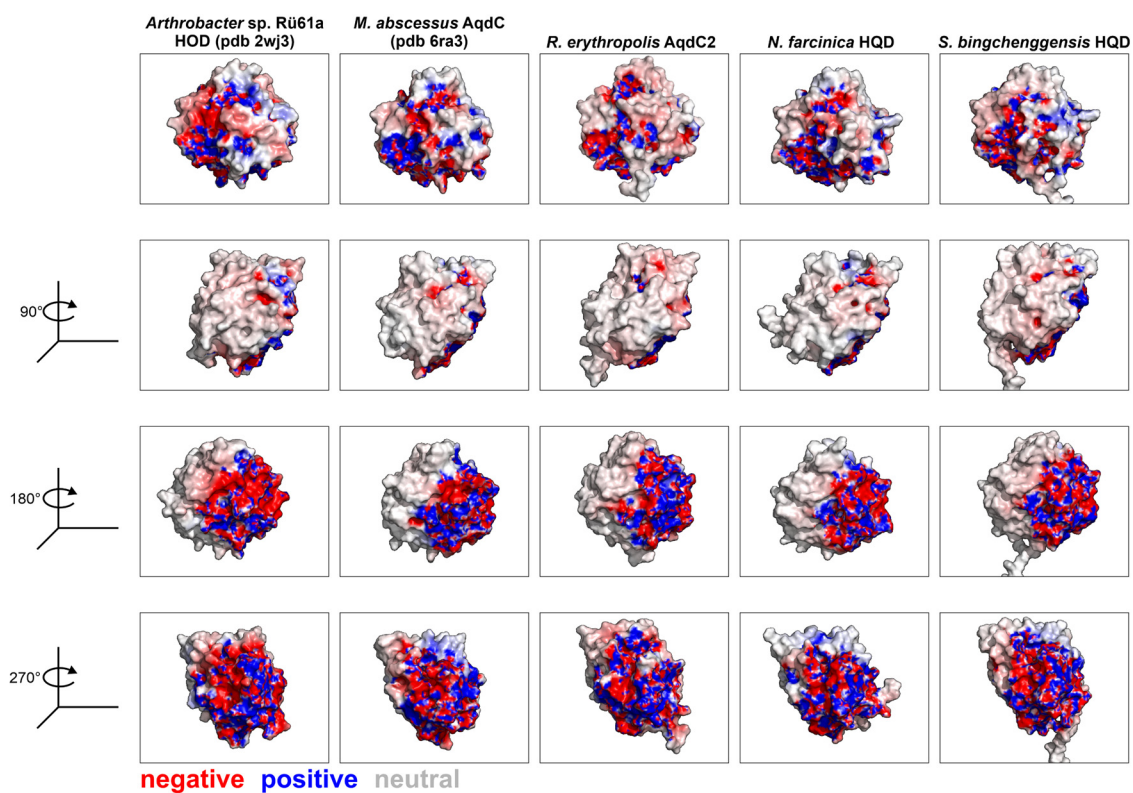

**Figure S2.** Scheme of the electrostatic surface potential of the dioxygenases HOD, Aqdc, Aqdc2, HQD<sub>N.f.</sub> and HQD<sub>S.b.</sub>. Structural models of the enzymes were generated with AlphaFold [49,50] and their electrostatic properties were calculated using the Poisson-Boltzmann equation. Blue and red represent positive and negative electrostatic surface potential, respectively, whereas white color indicates neutral electrostatic surface potential.
